# Supplementary material
Source: PubMed Central journal article supplement (PMC9161799)
Supplement: ASN.2021081125SupplementaryData.pdf [file ASN.2021081125SupplementaryData.pdf]

## **Supplemental Table of Contents**

**Supplemental Figure 1.** Chemical structure of BLU2864

**Supplemental Figure 2.** Cross-sections of left kidneys from all *Pkd1*<sup>RC/RC</sup> mice expressing RlaB and controls.

**Supplemental Figure 3.** Coronal MR images of kidneys from all control and BLU2864-treated *Pkd1*<sup>RC/RC</sup> mice at randomization and end of study.

**Supplemental Figure 4.** Cross-sections of left kidneys from all control and BLU2864-treated *Pkd1*<sup>RC/RC</sup> mice at end of study.

**Supplemental Table 1.** Kinases with the highest binding affinity for BLU2864

**Supplemental Table 2.** Enzymatic inhibition of PRKACA and closely related kinases by BLU2864

**Supplemental Table 3.** Western blot quantification normalized to loading control

SUPPLEMENTAL MATERIAL

Supplemental Figure 1.

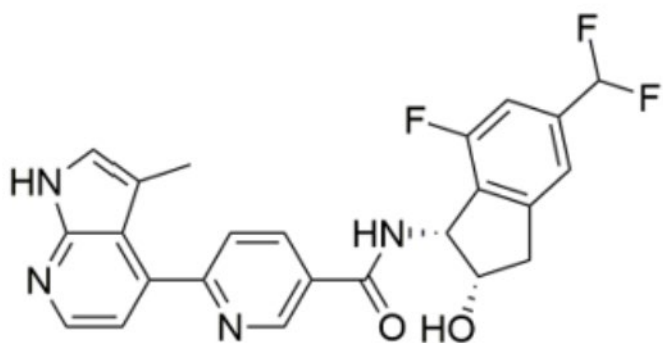

Supplemental Figure 1. Chemical structure of BLU2864.

Supplemental Figure 2a-Male

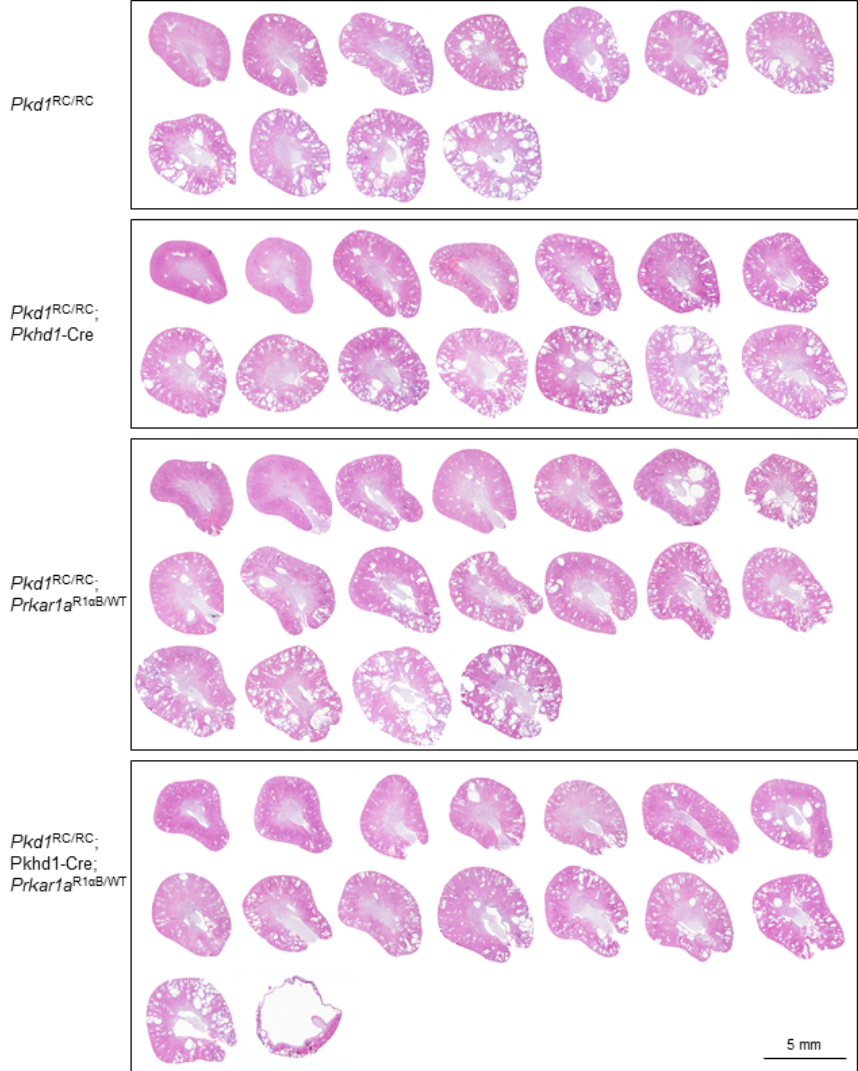

Supplemental Figure 2b-Female

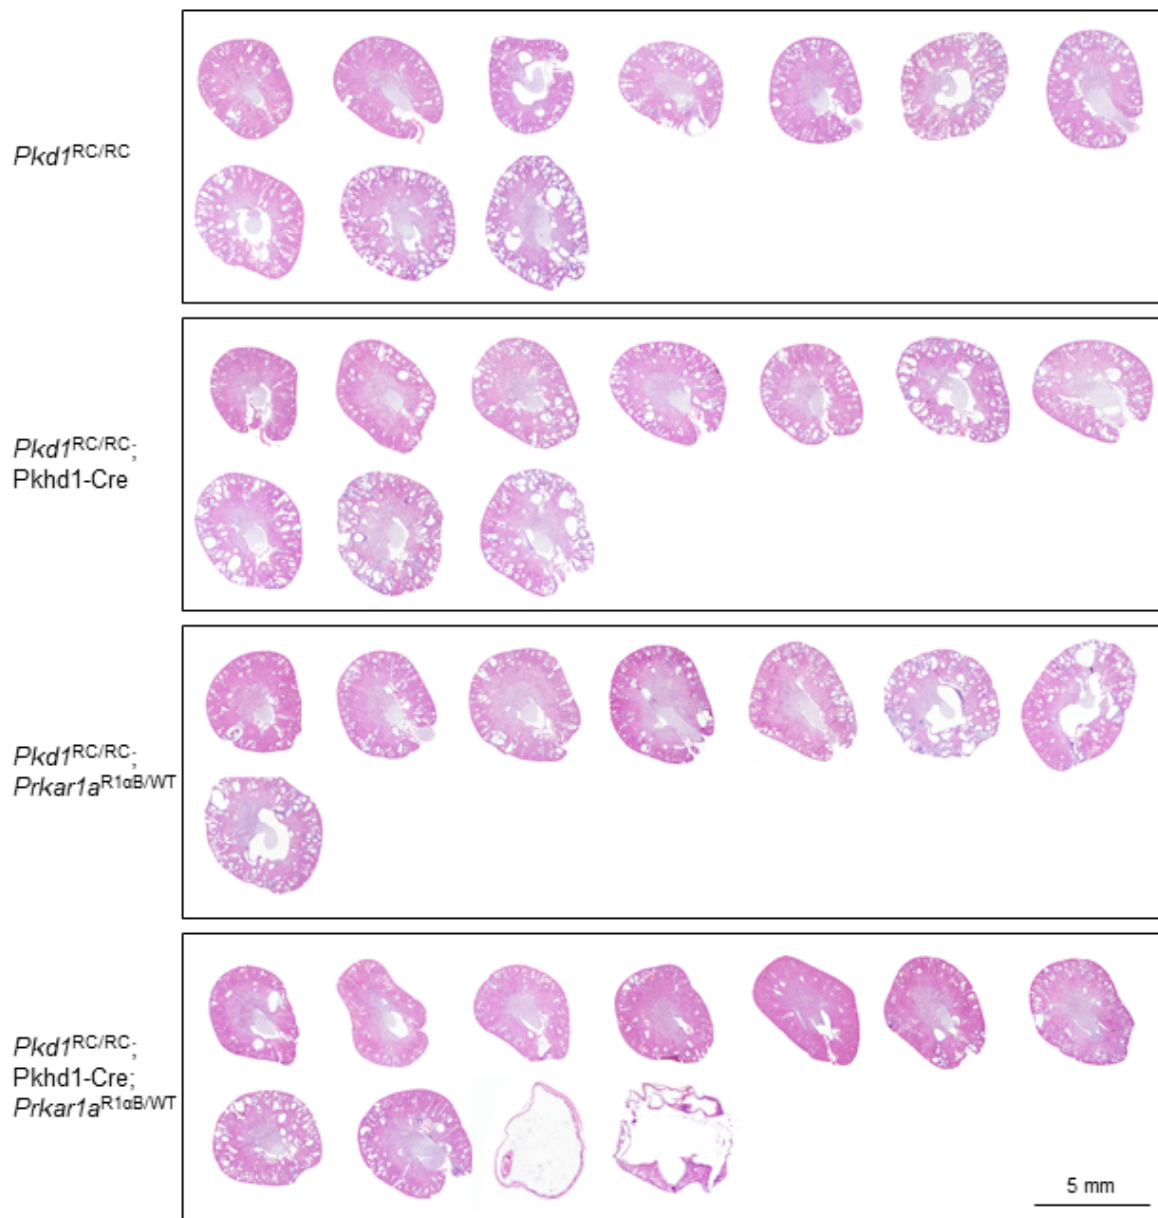

Supplemental Figure 2. Cross-sections of left kidneys stained with periodic hematoxylin and eosin from all control  $Pkd1^{RC/RC}$  male (A) and female (B) mice ( $Pkd1^{RC/RC}; Pkhd1-Cre; Prkar1\alpha^{WT/WT}$ ,  $Pkd1^{RC/RC}; Prkar1\alpha^{WT/WT}$  and  $Pkd1^{RC/RC}; Prkar1\alpha^{R1\alpha B/WT}$ ) and from all  $Pkd1^{RC/RC}$  male (A) and female (B) mice expressing the R1 $\alpha$ B allele ( $Pkd1^{RC/RC}; Pkhd1-Cre; Prkar1\alpha^{R1\alpha B/WT}$ ), ordered from least to most cystic.

Supplemental Figure 3a.

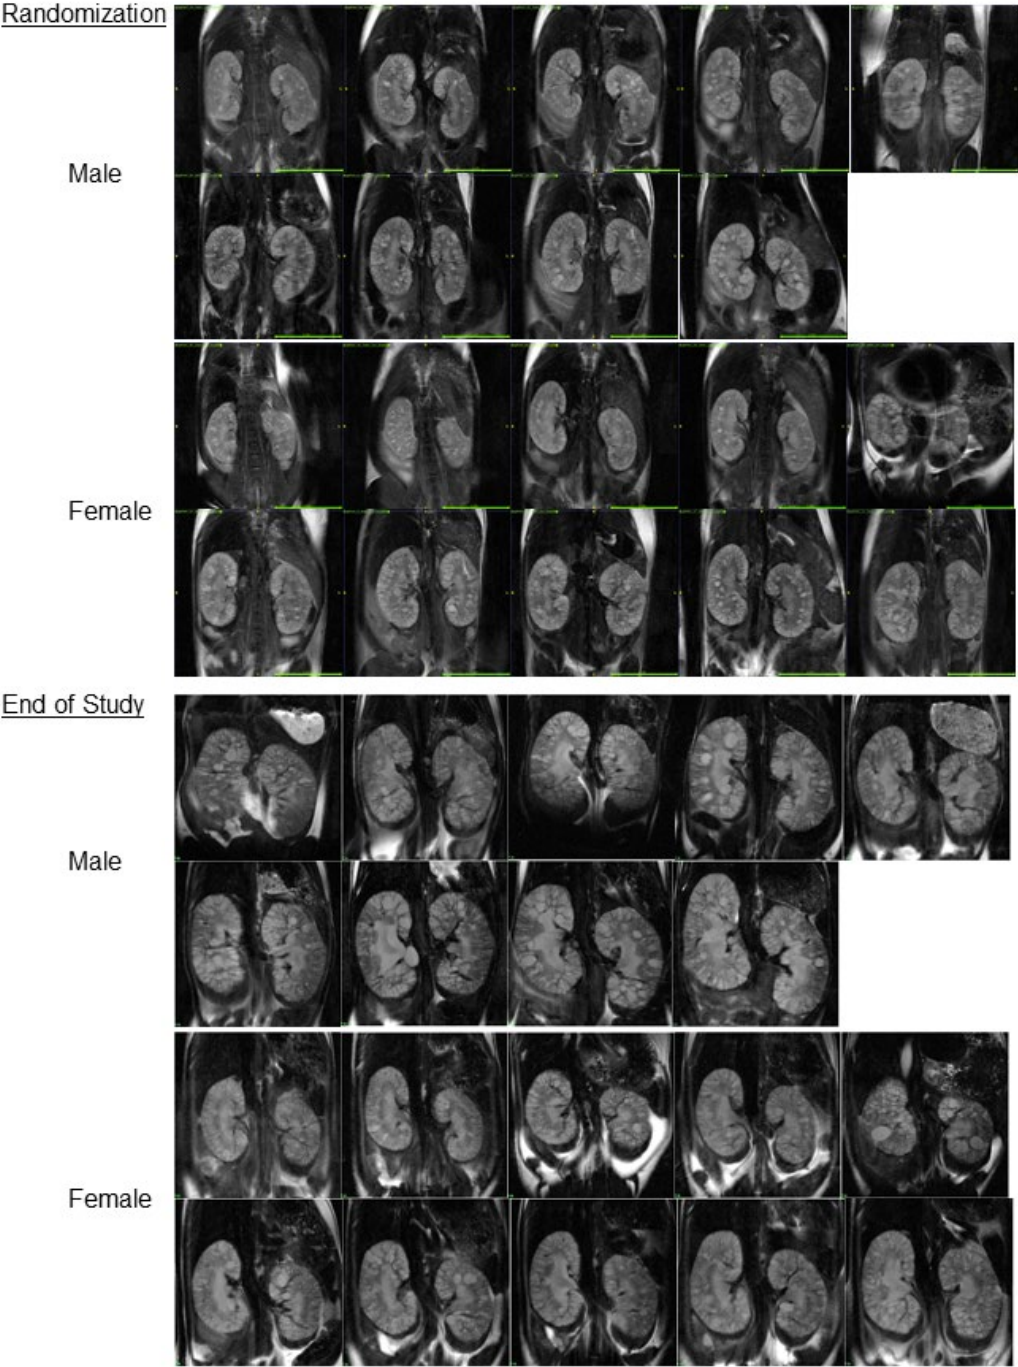

Supplemental Figure 3b.

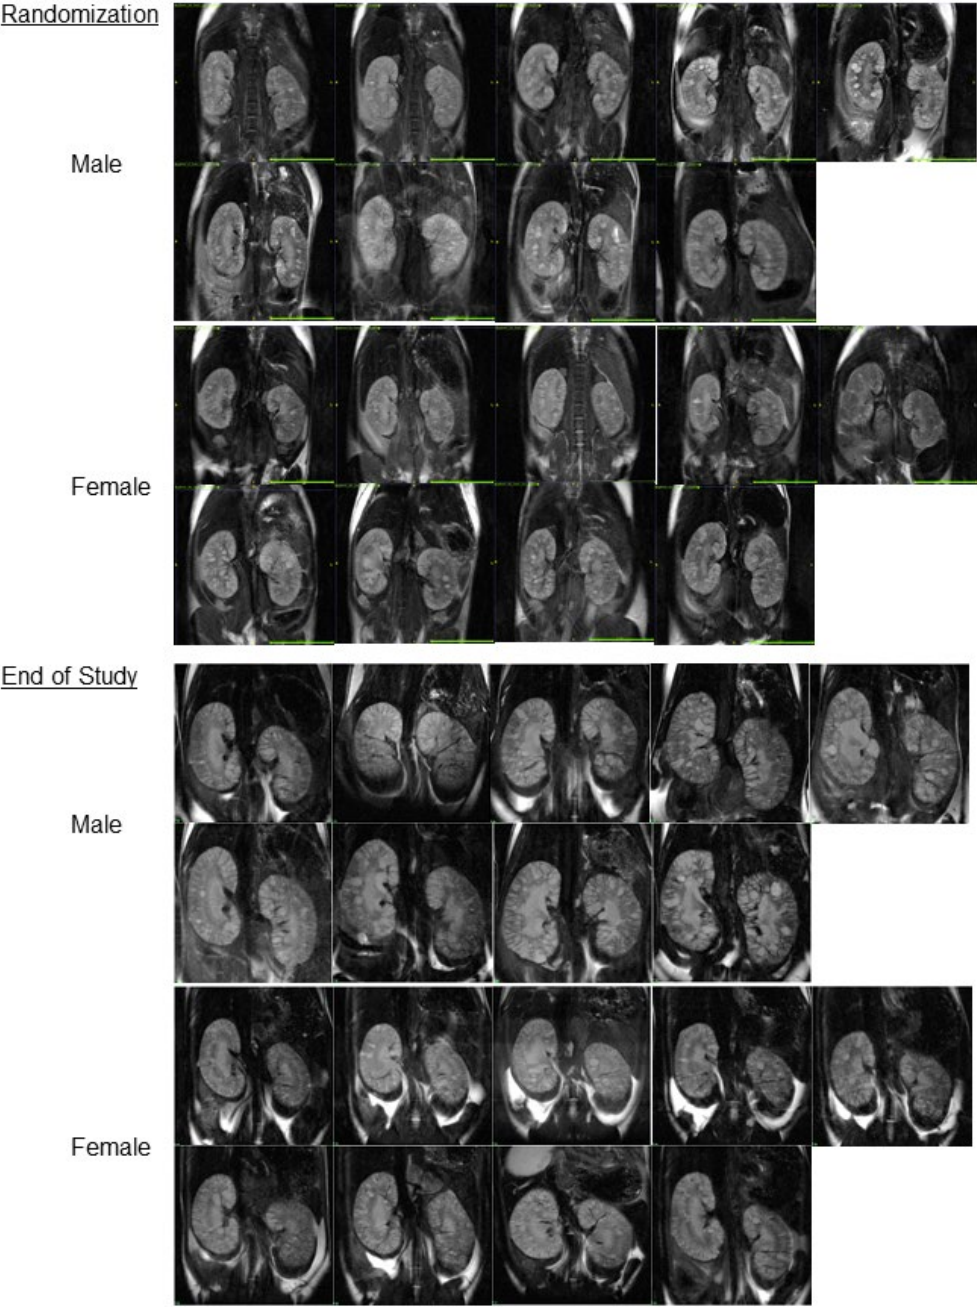

Supplemental Figure 3. Coronal MR images of the kidneys from control (A) and BLU2864-treated *Pkd1<sup>RC/RC</sup>* (B) mice at randomization and at the end of the study, ordered from least to most cystic at the end of the study.

Supplemental Figure 4.

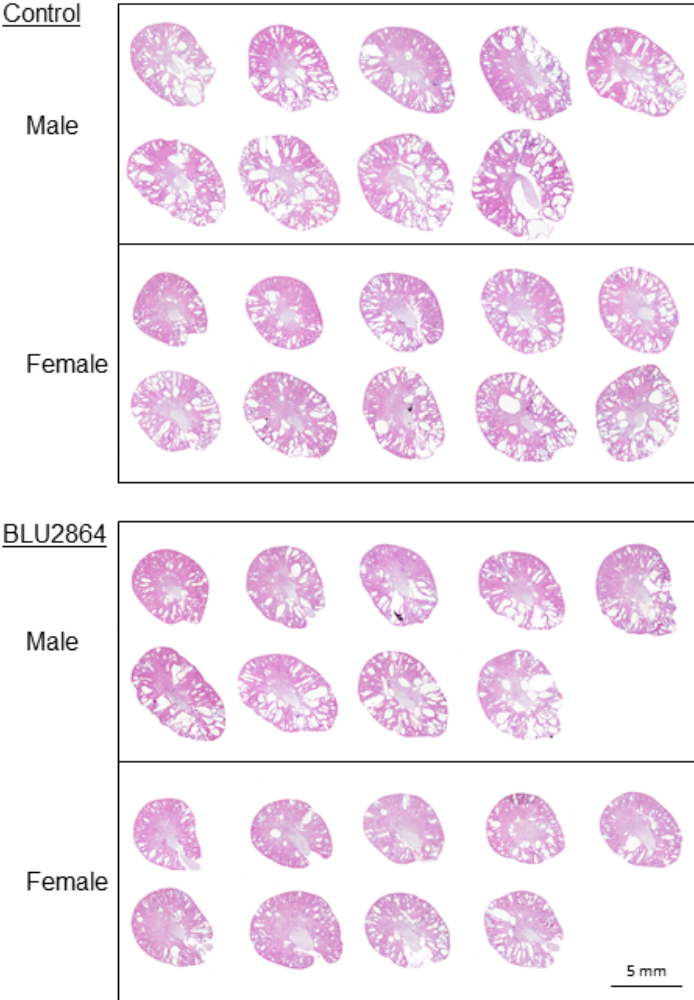

Supplemental Figure 4. Cross-sections of left kidneys stained with periodic hematoxylin and eosin from control and BLU2864-treated *Pkd1*<sup>RC/RC</sup> mice, ordered from least to most cystic.

| Supplemental Table S1. Kinases with the highest binding affinity for BLU2864 |         |
|------------------------------------------------------------------------------|---------|
| Target                                                                       | Kd (nM) |
| PKAC-alpha                                                                   | 3.3     |
| ROCK2                                                                        | 4.8     |
| ROCK1                                                                        | 5.4     |
| PKAC-beta                                                                    | 6.3     |
| PRKX                                                                         | 16.5    |
| SNARK                                                                        | 26      |
| JAK2(JH1domain-catalytic)                                                    | 27.5    |
| MEK1                                                                         | 29      |
| JAK3(JH1domain-catalytic)                                                    | 50      |
| MEK4                                                                         | 68.5    |
| TYK2(JH1domain-catalytic)                                                    | 99.5    |

| Supplemental Table S2. Enzymatic inhibition of PRKACA and closely related kinases by BLU2864 |                |
|----------------------------------------------------------------------------------------------|----------------|
|                                                                                              | IC50 at ATP Km |
| PRKACA                                                                                       | 0.3 nM         |
| PRKACB                                                                                       | 0.7 nM         |
| ROCK2                                                                                        | 12.7 nM        |
| AKT1                                                                                         | 2120.0 nM      |
| AKT2                                                                                         | 4910.0 nM      |
| AKT3                                                                                         | 475.0 nM       |
| PRKX                                                                                         | 6.8 nM         |



| Supplemental Table 3. Western blot quantification normalized to loading control |                                                                               |                                                     |         |                     |                     |         |
|---------------------------------------------------------------------------------|-------------------------------------------------------------------------------|-----------------------------------------------------|---------|---------------------|---------------------|---------|
| Protein                                                                         | <i>Pkd1</i> <sup>RC/RC</sup><br><i>Prkar1α</i> <sup>R1αB/WT</sup><br>(N=3, M) | <i>Pkd1</i> <sup>RC/RC</sup><br>R1αB-ON<br>(N=3, M) | P-value | Control<br>(N=3, M) | BLU2864<br>(N=3, M) | P-value |
| PKA RIα                                                                         | 1.00±0.22                                                                     | 0.32±0.05                                           | 0.029   | 1.00±0.05           | 0.40±0.08           | 0.001   |
| PKA RIβ                                                                         | 1.00±0.08                                                                     | 0.87±0.08                                           | 0.107   | 1.00±0.04           | 0.70±0.04           | 0.001   |
| PKA RIIα                                                                        | 1.00±0.10                                                                     | 1.03±0.04                                           | 0.697   | 1.00±0.04           | 1.18±0.15           | 0.158   |
| PKA RIIβ                                                                        | 1.00±0.21                                                                     | 0.90±0.12                                           | 0.504   | 1.00±0.07           | 0.93±0.03           | 0.214   |
| PKA Cα                                                                          | 1.00±0.04                                                                     | 1.10±0.16                                           | 0.396   | 1.00±0.04           | 1.08±0.12           | 0.386   |
| Glycosylated AQP2                                                               | 1.00±0.07                                                                     | 0.16±0.07                                           | <0.001  | 1.00±0.20           | 0.54±0.05           | 0.049   |
| Unglycosylated AQP2                                                             | 1.00±0.18                                                                     | 0.26±0.09                                           | 0.009   | 1.00±0.08           | 0.43±0.05           | 0.001   |
| Total AQP2                                                                      | 1.00±0.07                                                                     | 0.17±0.07                                           | <0.001  | 1.00±0.18           | 0.54±0.03           | 0.047   |
| Glycosylated p-AQP2                                                             | 1.00±0.01                                                                     | 0.12±0.03                                           | <0.001  | 1.00±0.09           | 0.65±0.01           | 0.019   |
| Unglycosylated p-AQP2                                                           | 1.00±0.05                                                                     | 0.10±0.01                                           | <0.001  | 1.00±0.10           | 0.66±0.05           | 0.015   |
| Total p-AQP2                                                                    | 1.00±0.02                                                                     | 0.12±0.03                                           | <0.001  | 1.00±0.09           | 0.65±0.01           | 0.020   |
| PCNA                                                                            | 1.00±0.03                                                                     | 0.43±0.02                                           | <0.001  | 1.00±0.05           | 0.66±0.08           | 0.005   |
| Src                                                                             | 1.00±0.10                                                                     | 1.29±0.70                                           | 0.547   | 1.00±0.18           | 1.01±0.06           | 0.957   |
| P-Src                                                                           | 1.00±0.09                                                                     | 0.63±0.06                                           | 0.007   | 1.00±0.18           | 0.40±0.03           | 0.028   |
| ERK1/2                                                                          | 1.00±0.04                                                                     | 0.93±0.07                                           | 0.206   | 1.00±0.05           | 0.72±0.03           | 0.003   |
| P-ERK1/2                                                                        | 1.00±0.07                                                                     | 0.46±0.05                                           | <0.001  | 1.00±0.05           | 0.76±0.01           | 0.009   |
| S6K                                                                             | 1.00±0.08                                                                     | 0.79±0.10                                           | 0.049   | 1.00±0.04           | 1.08±0.04           | 0.072   |
| P-S6K                                                                           | 1.00±0.04                                                                     | 0.44±0.03                                           | <0.001  | 1.00±0.12           | 0.53±0.05           | 0.011   |
| 4E-BP1                                                                          | 1.00±0.17                                                                     | 0.62±0.06                                           | 0.046   | 1.00±0.14           | 0.52±0.02           | 0.023   |
| P-4E-BP1                                                                        | 1.00±0.19                                                                     | 0.53±0.04                                           | 0.049   | 1.00±0.10           | 0.59±0.03           | 0.011   |
| GSK3β                                                                           | 1.00±0.12                                                                     | 0.92±0.06                                           | 0.370   | 1.00±0.14           | 0.84±0.04           | 0.190   |
| P-GSK3β                                                                         | 1.00±0.10                                                                     | 0.45±0.05                                           | 0.004   | 1.00±0.09           | 0.40±0.01           | 0.007   |

|           |           |           |        |  |           |            |       |
|-----------|-----------|-----------|--------|--|-----------|------------|-------|
| Akt       | 1.00±0.05 | 0.93±0.03 | 0.114  |  | 1.00±0.10 | 1.15±0.11  | 0.155 |
| PS473-Akt | 1.00±0.06 | 0.40±0.05 | <0.001 |  | 1.00±0.05 | 0.52±0.16  | 0.026 |
| PT308-Akt | 1.00±0.04 | 0.48±0.07 | 0.001  |  | 1.00±0.13 | 0.56±0.16  | 0.024 |
| CREB      | 1.00±0.13 | 0.31±0.11 | 0.003  |  | 1.00±0.09 | 0.41±0.004 | 0.007 |
| P-CREB    | 1.00±0.03 | 0.43±0.12 | 0.012  |  | 1.00±0.08 | 0.32±0.02  | 0.003 |
| STAT3     | 1.00±0.09 | 0.67±0.07 | 0.007  |  | 1.00±0.02 | 0.75±0.03  | 0.001 |
| P-STAT3   | 1.00±0.11 | 0.49±0.02 | 0.012  |  | 1.00±0.14 | 0.55±0.05  | 0.021 |
| PAX2      | 1.00±0.10 | 0.37±0.11 | 0.002  |  | 1.00±0.10 | 0.60±0.09  | 0.008 |
| Gli1      | 1.00±0.09 | 1.54±0.23 | 0.041  |  | 1.00±0.07 | 1.60±0.18  | 0.018 |
| Gli2      | 1.00±0.05 | 1.33±0.15 | 0.048  |  | 1.00±0.01 | 1.24±0.05  | 0.015 |
| Gli3-A    | 1.00±0.15 | 0.65±0.12 | 0.038  |  | 1.00±0.15 | 0.50±0.07  | 0.016 |
| Gli3-R    | 1.00±0.14 | 1.07±0.22 | 0.677  |  | 1.00±0.05 | 1.11±0.04  | 0.049 |
